# Supplementary material for: DEC205-DC targeted DNA vaccine against CX3CR1 protects against atherogenesis in mice
Source: PLoS One. 2018 Apr 11;13(4):e0195657. doi: 10.1371/journal.pone.0195657 (PMC5895033; doi:10.1371/journal.pone.0195657)
Supplement: S6 Table — (XLSX) [file pone.0195657.s006.xlsx]

## Sheet: Sheet1
			SMC	% in plaque area
	Non-vaccinated		Adjuvant only		Con-CX3CR1		DEC-CX3CR1
	15.96		4.66		18.34		11.45
	8.38		25.82		14.61		7.73
	24.27		24.16		7.95		8.74
	23.05		17.87		4.84		8.69
	15.27		8.65		5.63		14.74
	12.92		6.79		9.65		9.17
	19.65		12.06		25.85		17.05
	18.83		23.77		17.88		19.23
	15.43		16.77		10.41		12.24
	7.83		7.7		2.2		17.02
	11.39		11.58		22.44		9.11
	16.1		21.82		4.45		14.89
	10.49		26.68		4.25		12.68
	19.33		4.71		19.25		16.9
	13.9		21		9.89		12.49
	15.49		11.6		11.91		9.55
	19.78		17.36		9.92
	15.24
	15.37
S6 Table. Results of measurements of α-Smooth Muscle Actin (% in plaque) in brachiocephalic arteries.
